# Supplementary material for: Antifungal mechanism of cinnamaldehyde and citral combination against Penicillium expansum based on FT-IR fingerprint, plasma membrane, oxidative stress and volatile profile
Source: PubMed Central journal article supplement — RSC Adv. 2018 Feb 5;8(11):5806–15. doi: 10.1039/c7ra12191a (PMC9078163; doi:10.1039/c7ra12191a), 2018-02-05
Supplement: RA-008-C7RA12191A-s001.pdf [file RA-008-C7RA12191A-s001.pdf]

1 **RSC Advances**

2

3 **Supplemental material**

4

5 **Antifungal mechanism of cinnamaldehyde and citral combination against**  
6 ***Penicillium expansum* based on FT-IR fingerprint, plasma membrane, oxidative**  
7 **stress and volatile profile**

8 Yuan Wang<sup>1,2,3,4</sup>, Kewei Feng<sup>5</sup>, Haihua Yang<sup>2,3,4</sup>, Yahong Yuan<sup>2,3,4</sup>, Tianli Yue<sup>1,2,3,4\*</sup>

9

10 <sup>1</sup> Northwest University, College of Food Science and Engineering, Xi'an, Shaanxi  
11 710069, China. <sup>2</sup> Northwest A&F University, College of Food Science and Engineering,  
12 Yangling, Shaanxi 712100, China. <sup>3</sup> Laboratory of Quality & Safety Risk Assessment  
13 for Agro-products (YangLing), Ministry of Agriculture, Yangling, Shaanxi 712100,  
14 China. <sup>4</sup> National Engineering Research Center of Agriculture Integration Test  
15 (Yangling), Yangling, Shaanxi 712100, China. <sup>5</sup> Northwest A&F University, State Key  
16 Laboratory of Crop Stress Biology in Arid Areas, College of Agronomy, Yangling  
17 712100, China.

18

19 **\*Correspondence to: Prof. Dr. Tianli Yue**

20 College of Food Science and Engineering, Northwest University, Xi'an, Shaanxi  
21 710069, China.

22 College of Food Science and Engineering, Northwest A&F University, Yangling,  
23 Shaanxi, 712100, China.

24 E-mail address: yuetl305@nwsuaf.edu.cn

25 Tel: +86-29-87092261

26 Fax: +86-29-87092261

27

28

29

30 **Table captions**

31 **Table S1** MIC, MFC, MIC<sub>cin/cit</sub> and FICI of cinnamaldehyde and citral against *P.*  
32 *expansum* F-WY-12-02.

33 **Table S2** List of VOCs identified from controls and *P. expansum* F-WY-12-02 grown  
34 in PDB supplemented with Cin/Cit.

35 **Table S1** MIC, MFC, MIC<sub>cin/cit</sub> and FICI of cinnamaldehyde and citral against *P.*

36 *expansum* F-WY-12-02.

|                | MIC <sup>a</sup> (mg l <sup>-1</sup> ) | MFC <sup>b</sup> (mg l <sup>-1</sup> ) | MIC <sub>cin/cit</sub> <sup>c</sup> (mg l <sup>-1</sup> ) | FICI <sup>d</sup> |
|----------------|----------------------------------------|----------------------------------------|-----------------------------------------------------------|-------------------|
| cinnamaldehyde | 90                                     | 100                                    | 45                                                        | 1                 |
| citral         | 140                                    | 150                                    | 70                                                        |                   |

37 <sup>a</sup> The minimum inhibitory concentration.

38 <sup>b</sup> The minimum fungicidal concentration.

39 <sup>c</sup> The minimum inhibitory concentration of cinnamaldehyde (Cin) and citral (Cit) in their combination (Cin/Cit),  
40 respectively.

41 <sup>d</sup> Fractional Inhibitory Concentration Index. Synergy (FICI ≤ 0.5), addition (0.5 < FICI ≤ 1), indifference (1 < FICI  
42 ≤ 4), or antagonism (FIC > 4).

43 **Table S2** List of VOCs identified from controls and *P. expansum* F-WY-12-02 grown in PDB supplemented with Cin/Cit.

| RI         | Volatile compound |                                     |     |       | RI | Volatile compound |         |      |                                                                  |   |   |   |   |
|------------|-------------------|-------------------------------------|-----|-------|----|-------------------|---------|------|------------------------------------------------------------------|---|---|---|---|
|            | Contro            | Cin/Cit                             | PDB | PDB/C |    | Contro            | Cin/Cit | PDB  | PDB/C                                                            |   |   |   |   |
|            | <b>Alcohols</b>   |                                     |     |       |    | <b>Esters</b>     |         |      |                                                                  |   |   |   |   |
| <b>X1</b>  | 463               | Ethanol                             | X   | X     | X  | X                 | X79     | 586  | Ethyl Acetate                                                    | - | - | X | X |
| <b>X2</b>  | 482               | Isopropyl Alcohol                   | X   | X     | X  | X                 | X80     | 869  | 2-Butenoic acid, 3-methyl-, ethyl ester                          | - | X | - | - |
| <b>X3</b>  | 562               | 1-Propanol                          | X   | -     | -  | -                 | X81     | 869  | Ethyl tiglate                                                    | X | - | - | - |
| <b>X4</b>  | 597               | 1-Propanol, 2-methyl-               | X   | -     | -  | -                 | X82     | 992  | 2-Hexenoic acid, ethyl ester                                     | - | X | - | - |
| <b>X5</b>  | 697               | 1-Butanol, 3-methyl-                | X   | X     | -  | -                 | X83     | 1180 | Formic acid, octyl ester                                         | X | - | X | - |
| <b>X6</b>  | 697               | 1-Butanol, 2-methyl-                | X   | X     | -  | -                 | X84     | 1183 | Octanoic acid, ethyl ester                                       | X | - | - | - |
| <b>X7</b>  | 728               | 3-Buten-1-ol, 3-methyl-             | X   | X     | -  | -                 | X85     | 1215 | Oxiranecarboxaldehyde, 3-methyl-3-(4-methyl-3-pentenyl)-         | - | X | - | - |
| <b>X8</b>  | 743               | 2,3-Butanediol                      | X   | -     | -  | -                 | X86     | 1284 | 2-Propenoic acid, 2-methyl-, 1,2-ethanediyl ester                | X | X | - | - |
| <b>X9</b>  | 845               | 3-Penten-1-ol, 4-methyl-            | -   | X     | -  | -                 | X87     | 1380 | Propanoic acid, 2-methyl-, 3-hydroxy-2,2,4-trimethylpentyl ester | X | - | X | - |
| <b>X10</b> | 964               | 5-Hepten-2-ol, 6-methyl-            | -   | X     | -  | -                 | X88     | 1520 | Glutaric acid, di(isobutyl) ester                                | X | X | - | - |
| <b>X11</b> | 969               | 1-Octen-3-ol                        | -   | X     | -  | -                 | X89     | 1557 | 2-Butenedioic acid (Z)-, dibutyl ester                           | X | - | - | - |
| <b>X12</b> | 985               | 6-Hepten-1-ol, 2-methyl-            | -   | X     | -  | -                 | X90     | 1605 | 2,2,4-Trimethyl-1,3-pentanediol diisobutyrate                    | X | X | X | X |
| <b>X13</b> | 995               | 2-Propyl-1-pentanol                 | X   | -     | -  | -                 | X91     | 1619 | Hexanedioic acid, bis(2-methylpropyl) ester                      | X | X | - | - |
| <b>X14</b> | 995               | 1-Hexanol, 2-ethyl-                 | -   | -     | X  | -                 | X92     | 1653 | Tributyl phosphate                                               | X | X | - | - |
| <b>X15</b> | 1059              | Eucalyptol                          | X   | -     | -  | -                 | X93     | 1878 | Hexadecanoic acid, methyl ester                                  | - | X | - | - |
| <b>X16</b> | 1059              | 1-Octanol                           | X   | X     | -  | -                 | X94     | 1882 | Oxalic acid, 2-ethylhexyl hexyl ester                            | X | - | - | - |
| <b>X17</b> | 1072              | 1,5,7-Octatrien-3-ol, 3,7-dimethyl- | -   | X     | -  | -                 | X95     | 1908 | 1,2-Benzenedicarboxylic acid,bis(2-methylpropyl) ester           | X | X | X | - |

|            |      |                                                                                    |   |   |   |   |      |      |                                                            |   |   |   |   |
|------------|------|------------------------------------------------------------------------------------|---|---|---|---|------|------|------------------------------------------------------------|---|---|---|---|
| <b>X18</b> | 1082 | Linalool                                                                           | X | X | - | - | X96  | 1978 | Hexadecanoic acid, ethyl ester                             | X | - | - | - |
| <b>X19</b> | 1136 | Phenylethyl Alcohol                                                                | X | X | - | - | X97  | 2037 | Dibutyl phthalate                                          | X | X | - | - |
| <b>X20</b> | 1137 | 3-Cyclohexen-1-ol,<br>4-methyl-1-(1-methylethyl)-, (R)-                            | - | X | - | - | X98  | 2276 | Nonadecanoic acid, ethyl ester                             | X | - | - | - |
| <b>X21</b> | 1143 | L-.alpha.-Terpineol                                                                | X | X | - | - |      |      | <b>Ketones</b>                                             |   |   |   |   |
| <b>X22</b> | 1146 | 4-Hexen-1-ol,5-methyl-2-(1-methylethenyl)-, (R)-                                   | - | X | - | - | X99  | 455  | Acetone                                                    | X | - | - | - |
| <b>X23</b> | 1159 | 1-Nonanol                                                                          | X | - | - | - | X100 | 820  | 5-Hexen-2-one, 5-methyl-                                   | X | - | - | - |
| <b>X24</b> | 1164 | cis-Linalool oxide                                                                 | - | X | - | - | X101 | 853  | 2-Heptanone                                                | X | - | X | - |
| <b>X25</b> | 1164 | Cyclohexanol,5-methyl-2-(1-methylethyl)-,<br>(1 $\alpha$ ,2 $\beta$ ,5 $\alpha$ )- | X | - | - | - | X102 | 938  | 5-Hepten-2-one, 6-methyl-                                  | - | X | - | - |
| <b>X26</b> | 1179 | 6-Octen-1-ol, 3,7-dimethyl-, (R)-                                                  | - | X | - | - | X103 | 952  | 3-Octanone                                                 | X | - | X | - |
| <b>X27</b> | 1228 | 2,6-Octadien-1-ol, 3,7-dimethyl-, (Z)-                                             | - | X | - | - | X104 | 1029 | Acetophenone                                               | - | - | X | - |
| <b>X28</b> | 1228 | 2,6-Octadien-1-ol, 3,7-dimethyl-, (E)-                                             | - | X | - | - | X105 | 1121 | (+)-2-Bornanone                                            | X | - | - | - |
| <b>X29</b> | 1230 | 2-Cyclohexene-1-methanol,<br>2,6,6-trimethyl-                                      | - | X | - | - | X106 | 1158 | 2-Cyclohexen-1-one, 3-methyl-6-(1-methylethyl)-            | - | X | - | - |
| <b>X30</b> | 1243 | 2-Propen-1-ol, 3-phenyl-                                                           | - | X | - | - | X107 | 1190 | 2-Cyclohexen-1-one,<br>3-methyl-6-(1-methylethenyl)-, (S)- | - | X | - | - |
| <b>X31</b> | 1258 | 1-Decanol                                                                          | X | - | - | - | X108 | 1420 | 5,9-Undecadien-2-one, 6,10-dimethyl-                       | - | - | X | - |
| <b>X32</b> | 1357 | 1-Undecanol                                                                        | X | - | - | - |      |      | <b>Phenols</b>                                             |   |   |   |   |
| <b>X33</b> | 1457 | 1-Dodecanol                                                                        | X | - | - | - | X109 | 983  | Benzene, 1-methoxy-3-methyl-                               | X | - | - | - |
| <b>X34</b> | 1543 | Cedrol                                                                             | X | X | - | - | X110 | 1014 | Phenol, 3-methyl-                                          | X | X | - | - |
|            |      | <b>Aldehydes</b>                                                                   |   |   |   |   | X111 | 1077 | Benzene, (2-methyl-1-propenyl)-                            | - | X | - | X |
| <b>X35</b> | 408  | Acetaldehyde                                                                       | X | X | - | - | X112 | 1235 | 1,4-Benzenediol, 2-methyl-                                 | - | X | - | - |
| <b>X36</b> | 543  | Propanal, 2-methyl-                                                                | X | - | - | - | X113 | 1261 | Benzene, 4-ethenyl-1,2-dimethoxy-                          | X | - | - | - |
| <b>X37</b> | 643  | Butanal, 3-methyl-                                                                 | X | - | - | - | X114 | 1271 | Benzene, 4-ethyl-1,2-dimethoxy-                            | X | - | - | - |

|            |      |                                                    |        |   |   |   |      |      |                                                              |   |   |   |   |
|------------|------|----------------------------------------------------|--------|---|---|---|------|------|--------------------------------------------------------------|---|---|---|---|
| <b>X38</b> | 806  | Hexanal                                            | X      | X | X | - | X115 | 1480 | 1,1'-Biphenyl, 2-methyl-                                     | - | - | X | - |
| <b>X39</b> | 905  | Heptanal                                           | X      | X | X | - | X116 | 1555 | Phenol, 2,5-bis(1,1-dimethylethyl)-                          | X | X | X | X |
| <b>X40</b> | 982  | Benzaldehyde                                       | X      | X | X | X | X117 | 1566 | Diphenylamine                                                | X | X | - | - |
| <b>X41</b> | 1005 | Octanal                                            | X      | X | - | - | X118 | 1633 | 2,5-Cyclohexadiene-1,4-dione,<br>2,6-bis(1,1-dimethylethyl)- | - | - | X | - |
| <b>X42</b> | 1013 | 2-Octenal, (E)-                                    | -      | - | X | - | X119 | 1668 | Butylated Hydroxytoluene                                     | - | X | - | - |
| <b>X43</b> | 1081 | Benzeneacetaldehyde                                | X      | - | X | - | X120 | 1902 | Phenol,<br>2,6-bis(1,1-dimethylethyl)-4-(1-methylpropyl)-    | - | - | X | - |
| <b>X44</b> | 1095 | Benzaldehyde, 3-methyl-                            | -      | - | X | - | X121 | 1950 | 2,6-Di-tert-butyl-4-nitrophenol                              | X | - | - | - |
| <b>X45</b> | 1095 | Benzaldehyde, 2-methyl-                            | -      | - | X | - |      |      | <b>Terpenes</b>                                              |   |   |   |   |
| <b>X46</b> | 1104 | Nonanal                                            | X      | X | X | - | X122 | 897  | Sabinene                                                     | - | X | - | - |
| <b>X47</b> | 1112 | 2-Nonenal, (E)-                                    | -      | - | X | - | X123 | 958  | $\beta$ -Myrcene                                             | - | X | - | - |
| <b>X48</b> | 1125 | 6-Octenal, 3,7-dimethyl-, (R)-                     | -      | X | - | - | X124 | 976  | 1,3,6-Octatriene, 3,7-dimethyl-, (Z)-                        | - | X | - | - |
| <b>X49</b> | 1186 | 1,3-Cyclohexadiene-1-carboxaldehyde,<br>trimethyl- | 2,6,6- | - | X | - | X125 | 998  | $\gamma$ -Terpinene                                          | - | X | - | - |
| <b>X50</b> | 1189 | Cinnamaldehyde, (E)-                               | -      | X | - | X | X126 | 1018 | D-Limonene                                                   | - | X | - | - |
| <b>X51</b> | 1204 | Decanal                                            | -      | X | - | - | X127 | 1052 | $\alpha$ -Terpinolene                                        | - | X | - | - |
| <b>X52</b> | 1212 | 2-Decenal, (E)-                                    | -      | - | X | - | X128 | 1125 | Isoneroloxide                                                | - | X | - | - |
| <b>X53</b> | 1402 | Dodecanal                                          | X      | - | - | - | X129 | 1147 | 6-Octenal, 7-methyl-3-methylene-                             | - | - | - | X |
| <b>X54</b> | 1601 | Tetradecanal                                       | X      | - | - | - | X130 | 1174 | 2,6-Octadienal, 3,7-dimethyl-, (E)-                          | - | X | - | X |
| <b>X55</b> | 1701 | Pentadecanal                                       | X      | - | - | - | X131 | 1174 | 2,6-Octadienal, 3,7-dimethyl-, (Z)-                          | - | X | - | X |
| <b>X56</b> | 1856 | 3,5-di-tert-Butyl-4-hydroxybenzaldehyde            | X      | X | - | - | X132 | 1174 | Citral                                                       | - | - | - | X |
|            |      | <b>Alkanes</b>                                     |        |   |   |   | X133 | 1175 | 1-p-Menthen-9-al                                             | - | X | - | - |
| <b>X57</b> | 518  | Pentane                                            | X      | X | - | - | X134 | 1184 | 3,6-Octadienal, 3,7-dimethyl-, (E)-                          | - | - | - | X |
| <b>X58</b> | 788  | Heptane, 2,3-dimethyl-                             | X      | - | - | - |      |      | <b>Acids</b>                                                 |   |   |   |   |

|            |      |                                     |   |   |   |   |      |      |                                           |   |   |   |   |
|------------|------|-------------------------------------|---|---|---|---|------|------|-------------------------------------------|---|---|---|---|
| <b>X59</b> | 1165 | Decane, 2,8,8-trimethyl-            | - | - | X | - | X135 | 1272 | Nonanoic acid                             | X | - | - | - |
| <b>X60</b> | 1185 | Nonane, 3-methyl-5-propyl-          | - | - | X | - | X136 | 1293 | (R)-(+)-Citronellic acid;                 | - | X | - | - |
| <b>X61</b> | 1320 | Dodecane, 2,6,10-trimethyl-         | X | - | - | - | X137 | 1375 | 2,6-Octadienoic acid, 3,7-dimethyl-, (E)- | - | - | - | X |
| <b>X62</b> | 1413 | Tetradecane                         | X | - | X | - | X138 | 1461 | 9-Oxononanoic acid                        | X | - | - | - |
| <b>X63</b> | 1448 | Tetradecane, 4-methyl-              | X | - | - | - | X139 | 1968 | n-Hexadecanoic acid                       | X | - | - | - |
| <b>X64</b> | 1465 | 2,6,10-Trimethyltridecane           | X | - | X | - |      |      | <b>Other category</b>                     |   |   |   |   |
| <b>X65</b> | 1555 | Cyclopentane, decyl-                | X | - | - | - | X140 | 722  | Disulfide, dimethyl                       | X | - | - | - |
| <b>X66</b> | 1576 | n-Nonylcyclohexane                  | X | - | X | - | X141 | 972  | Dimethyl trisulfide                       | X | - | - | - |
| <b>X67</b> | 1627 | 5,5-Dibutylnonane                   | X | - | X | - | X142 | 1111 | cis-Rose oxide                            | - | X | - | - |
| <b>X68</b> | 1653 | Pentadecane, 2,6,10,14-tetramethyl- | X | - | X | - | X143 | 1208 | Benzothiazole                             | X | - | X | - |
| <b>X69</b> | 1711 | Heptadecane                         | X | X | X | X | X144 | 1301 | Oxime-, methoxy-phenyl_                   | X | X | X | - |
| <b>X70</b> | 1753 | Hexadecane, 2,6,11,15-tetramethyl-  | - | - | X | - | X145 | 1548 | 2-(Methylmercapto)benzothiazole           | - | X | - | X |
| <b>X71</b> | 1753 | Hexadecane, 2,6,10,14-tetramethyl-  | - | - | X | - |      |      |                                           |   |   |   |   |
| <b>X72</b> | 2009 | Eicosane                            | X | X | X | - |      |      |                                           |   |   |   |   |
| <b>X73</b> | 2036 | Octadecane, 1-chloro-               | X | - | - | - |      |      |                                           |   |   |   |   |
| <b>X74</b> | 2109 | Heneicosane                         | X | - | X | - |      |      |                                           |   |   |   |   |
| <b>X75</b> | 2332 | 11-Methyltricosane                  | X | - | - | X |      |      |                                           |   |   |   |   |
| <b>X76</b> | 2664 | 2-Methylhexacosane                  | X | - | - | - |      |      |                                           |   |   |   |   |
| <b>X77</b> | 2840 | 2-methyloctacosane                  | - | X | - | - |      |      |                                           |   |   |   |   |
| <b>X78</b> | 3997 | Tetracontane                        | X | - | - | - |      |      |                                           |   |   |   |   |

44 X: Detected; -: Undetected.

45 Control: *P. expansum* grown in PDB (positive control).

46 Cin/Cit: *P. expansum* grown in PDB/Cin/Cit (treatment group).

47 PDB: PDB medium alone (negative control-1).

48 PDB/C: PDB/Cin/Cit without fungal inoculation (negative control-2).
